# Supplementary material
Source: PubMed Central journal article supplement (PMC8960054)
Supplement: NIHMS1745730-supplement-Supplementary_material_S1-S2.pdf [file NIHMS1745730-supplement-Supplementary_material_S1-S2.pdf]

## SUPPLEMENTARY MATERIAL

### Title: Intraoperative Margin Assessment in Oral and Oropharyngeal Cancer using Label-Free Fluorescence Lifetime Imaging and Machine Learning

Authors: Mark Marsden, Brent W. Weyers, Julien Bec, Tianchen Sun, Regina F. Gandour-Edwards, Andrew C. Birkeland, Marianne Abouyared, Arnaud F. Bewley, D. Gregory Farwell, Laura Marcu

#### S1. Comparison of Healthy Tongue and Tonsil FLIm Parameter Medians (*ex vivo*)

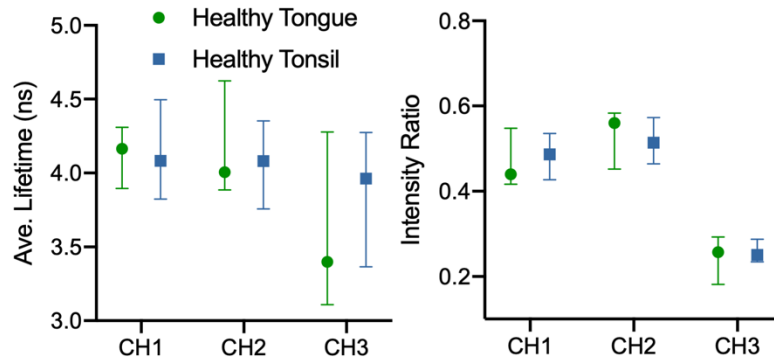

Figure S1. Average fluorescence lifetime and spectral intensity ratio medians (with 95% confidence interval) for healthy tongue and tonsil specimens (*ex vivo*). Higher variability is observed relative to *in vivo* imaging, particularly for average lifetime, likely due to effects of tumor excision (cauterization, loss of blood flow).

#### S2. Classifier Generalization to One-Off Anatomies and Conditions (*ex vivo*)

TISSUE CLASSIFICATION PERFORMANCE FOR ONE-OFF ANATOMIES AND CONDITIONS (*EX VIVO*) USING RANDOM FOREST (% $\pm$  95% CI)

| Anatomy/<br>Condition  | ROC-AUC           |
|------------------------|-------------------|
| Excessive bleeding     | 0.56              |
| Ulceration             | 0.61              |
| Pharynx                | 0.60              |
| Floor of Mouth         | Specificity: 0.60 |
| Posterior Maxilla      | 0.63              |
| Gingiva                | 0.70              |
| Lip                    | Specificity: 0.69 |
| Palate                 | 0.79              |
| Filiform Papillae      | 0.43              |
| glossotonsillar sulcus | 0.61              |
| Unknown Primary A      | 0.60              |
| Unknown Primary B      | Specificity: 0.67 |
| Unknown Primary C      | Specificity: 0.81 |
